# Supplementary material for: RETRACTED: Targeting Melanoma Hypoxia with the Food-Grade Lactic Acid Bacterium Lactococcus Lactis
Source: PubMed Central journal article supplement (PMC7072195; doi:10.3390/cancers12020438), 2020-02-13
Supplement: cancers-12-00438-s001.pdf [file cancers-12-00438-s001.pdf]

## Targeting melanoma hypoxia with the food-grade lactic acid bacterium *Lactococcus lactis*

Rodolfo Garza-Morales, Beatriz E. Rendon, Mohammad Tariq Malik, Jeannete E. Garza-Cabrales, Anne Aucouturier, Luis G. Bermúdez-Humarán, Kelly M. McMasters, Lacey R. McNally and Jorge G. Gomez-Gutierrez

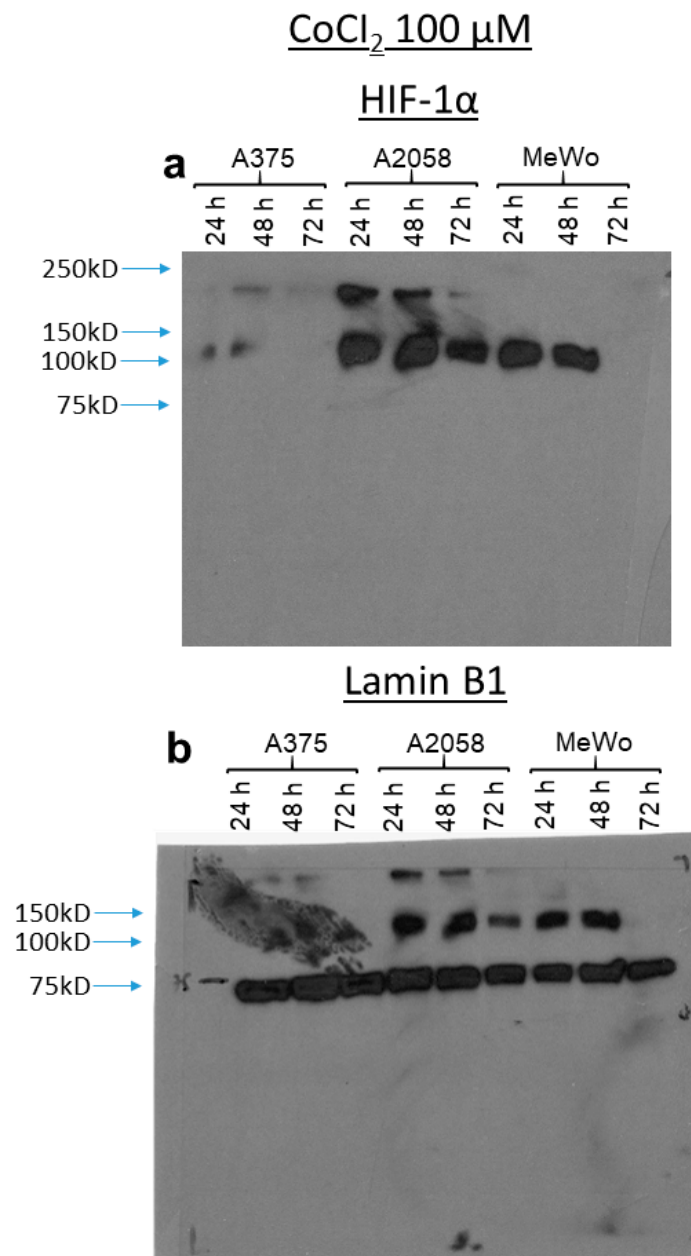

**Figure S1.** Representative whole blot. (a) A2058, A375, and MeWo cells were treated with CoCl<sub>2</sub> at a concentration of 100 μM. Nuclear protein lysates were collected at 24, 48, and 72 h post-treatment. Expression of HIF-1α was detected by Western blot; (b) Lamin B1 was used as a loading control.

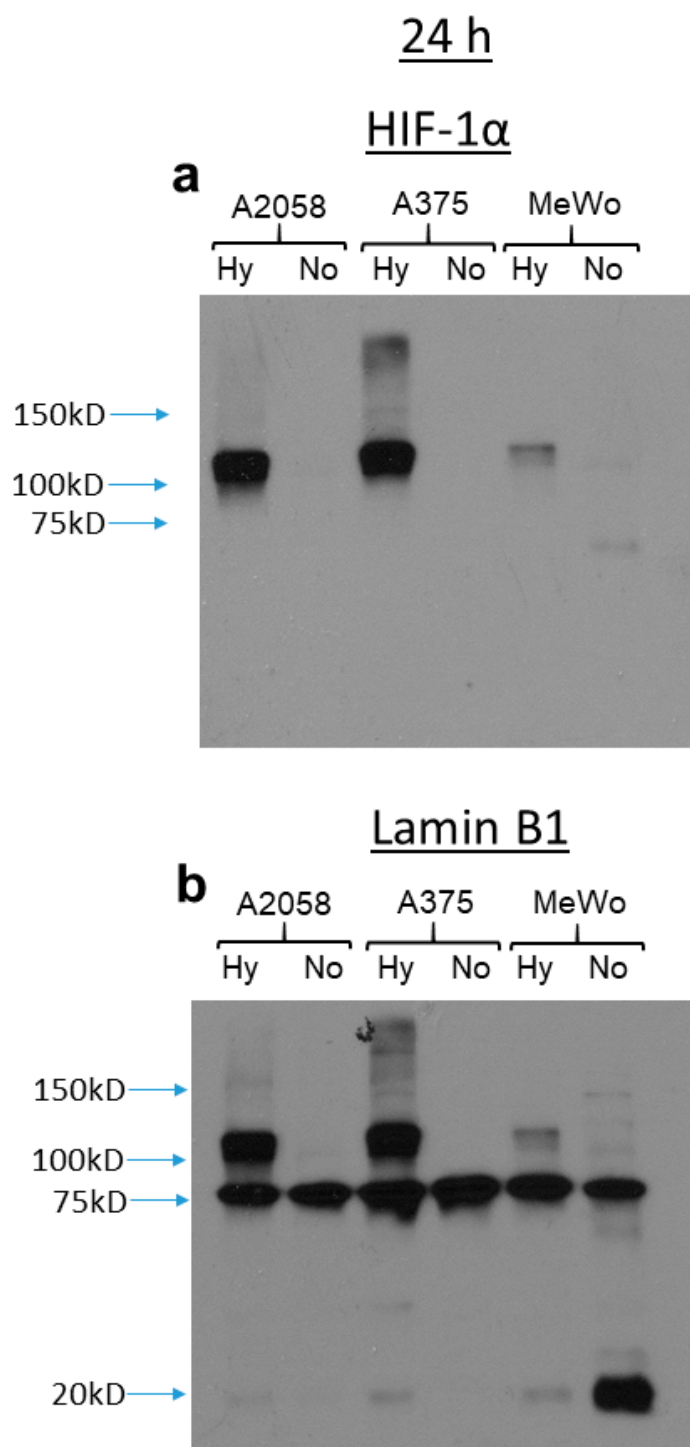

**Figure S2.** Representative whole blot. (a) A2058, A375, and MeWo cells were incubated on hypoxic (Hy) or normoxic (No) conditions. Nuclear protein lysates were collected at 24 h post-treatment. Expression of HIF-1 $\alpha$  was detected by Western blot; (b) Lamin B1 was used as a loading control.

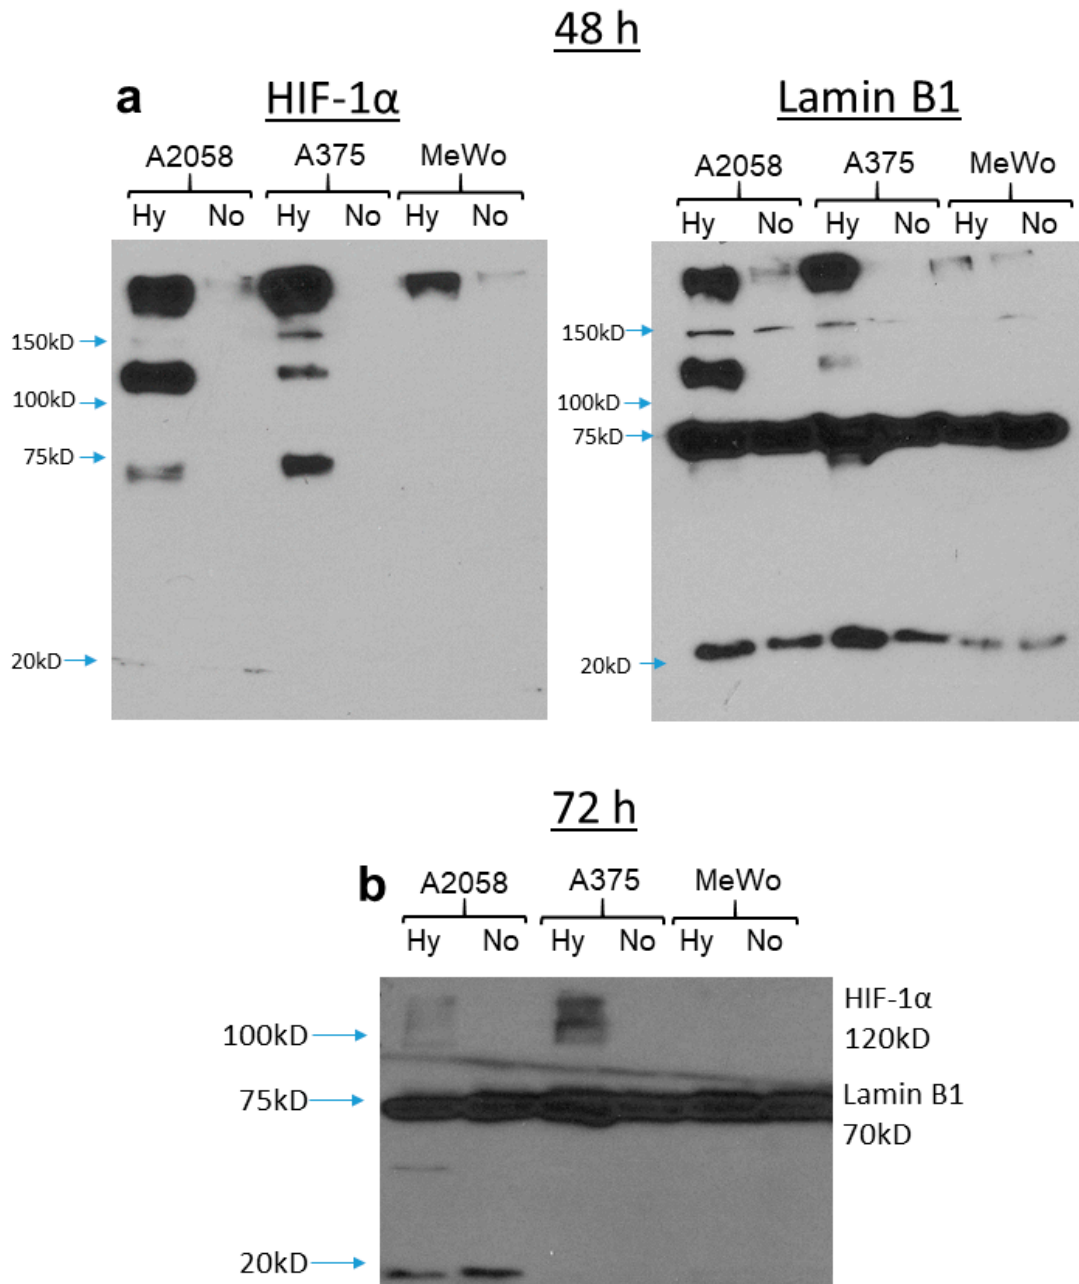

**Figure S3.** Representative whole blot. (a) A2058, A375, and MeWo cells were incubated on hypoxic (Hy) or normoxic (No) conditions. Nuclear protein lysates were collected at 48 h post-treatment. Expression of HIF-1 $\alpha$  was detected by Western blot; Lamin B1 was used as a loading control, (b) Cells were treated as mentioned above, nuclear protein lysates were collected at 72 h post-treatment. Expression of HIF-1 $\alpha$  was detected by Western blot; Lamin B1 was used as a loading control.

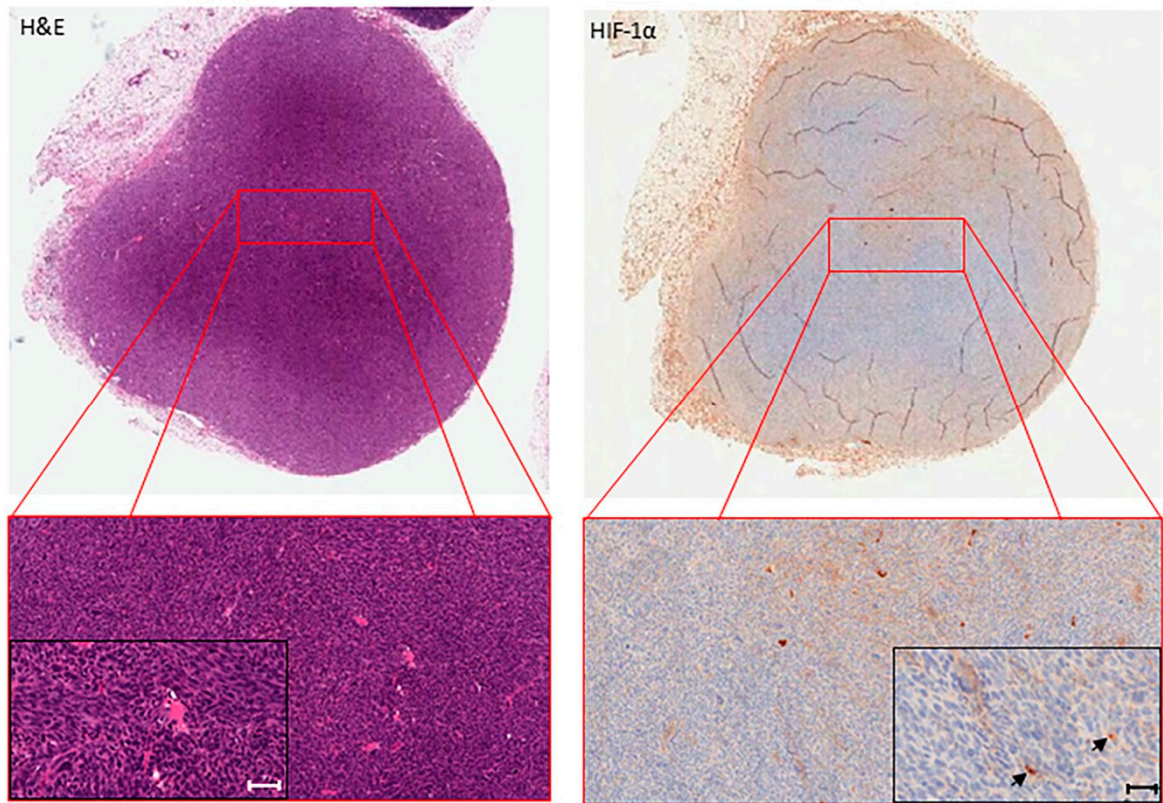

**Figure S4** . Representative Hematoxylin and Eosin (H&E) staining and IHC staining of HIF-1 $\alpha$  A375 tumor sections from non-injected BALB/c mice at a magnification of  $\times 100$  and  $\times 400$ . Arrows indicate cells positive for HIF-1 $\alpha$ . Whole tissue slides were scanned with Leica Aperio ImageScope with  $40\times$  magnification. Scale bar =  $50\ \mu\text{m}$ .

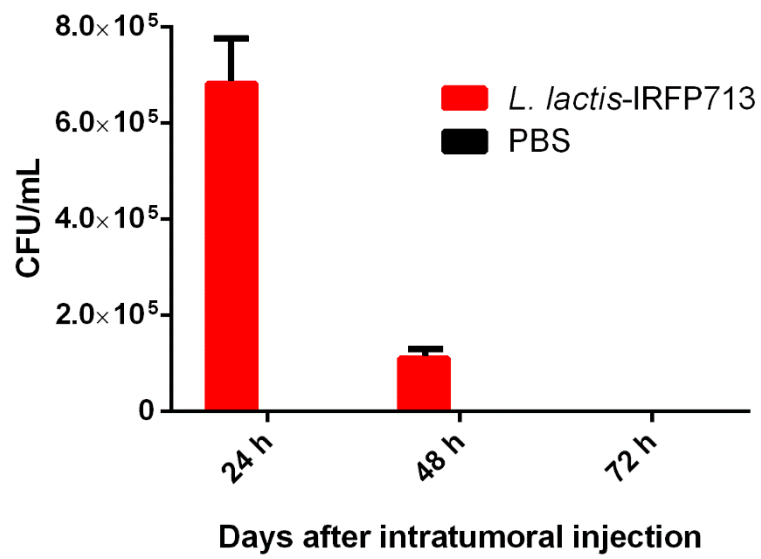

**Figure S5.** A375 tumors from BALB/c mice were homogenized at 24, 48 and 72 h following *L. lactis*-IRFP713 administration or PBS 1x. The homogenate was plated in serial dilutions on GM17 agar containing 10  $\mu$ g/ml chloramphenicol.

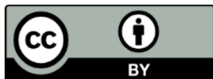

© 2019 by the authors. Licensee MDPI, Basel, Switzerland. This article is an open access article distributed under the terms and conditions of the Creative Commons Attribution (CC BY) license (<http://creativecommons.org/licenses/by/4.0/>).
